# Supplementary material for: High protonic conduction in two metal–organic frameworks containing high-density carboxylic groups
Source: Royal Society of Chemistry journal article supplement (doi:10.1039/c9nj05735h), 2020-01-01
Supplement: c9nj05735h1.pdf [file c9nj05735h1.pdf]

# High Protonic Conduction in Two Metal–Organic Frameworks Contained High-Density Carboxylic Groups

Yin Qin, Ming-Hao Xue, Bao-Heng Dou, Zhi-Bing Sun, and Gang Li\*

*College of Chemistry and Green Catalysis Center, Zhengzhou University, Zhengzhou 450001,  
Henan, P. R. China*

## Supporting Information

\*To whom correspondence should be addressed.

E-mail: [gangli@zzu.edu.cn](mailto:gangli@zzu.edu.cn).

---

\* Correspondence to: G. Li, College of Chemistry and Green Catalysis Center, Zhengzhou University, Zhengzhou 450001, Henan, P. R. China.

E-mail address: [gangli@zzu.edu.cn](mailto:gangli@zzu.edu.cn) (G. Li)

**Table S1.** Proton Conductivities ( $S\cdot\text{cm}^{-1}$ ) of **1** at Different RHs and Temperatures.

| temp ( $^{\circ}\text{C}$ ) | RH (%)                |                       |                       |                       |                       |
|-----------------------------|-----------------------|-----------------------|-----------------------|-----------------------|-----------------------|
|                             | 68                    | 75                    | 85                    | 93                    | 98                    |
| 30                          | $1.10 \times 10^{-7}$ | $1.26 \times 10^{-7}$ | $2.53 \times 10^{-7}$ | $5.32 \times 10^{-7}$ | $9.36 \times 10^{-7}$ |
| 40                          | $1.51 \times 10^{-7}$ | $6.07 \times 10^{-7}$ | $8.55 \times 10^{-7}$ | $8.75 \times 10^{-7}$ | $1.43 \times 10^{-6}$ |
| 50                          | $6.22 \times 10^{-7}$ | $6.23 \times 10^{-7}$ | $1.00 \times 10^{-6}$ | $1.54 \times 10^{-6}$ | $2.05 \times 10^{-6}$ |
| 60                          | $1.87 \times 10^{-6}$ | $2.40 \times 10^{-6}$ | $3.07 \times 10^{-6}$ | $4.53 \times 10^{-6}$ | $7.09 \times 10^{-6}$ |
| 70                          | $2.51 \times 10^{-6}$ | $3.34 \times 10^{-6}$ | $5.88 \times 10^{-6}$ | $1.22 \times 10^{-5}$ | $2.08 \times 10^{-5}$ |
| 80                          | $4.58 \times 10^{-6}$ | $5.50 \times 10^{-6}$ | $1.52 \times 10^{-5}$ | $3.81 \times 10^{-5}$ | $3.47 \times 10^{-4}$ |
| 90                          | $7.39 \times 10^{-6}$ | $1.40 \times 10^{-5}$ | $3.93 \times 10^{-5}$ | $9.41 \times 10^{-5}$ | $1.16 \times 10^{-3}$ |
| 100                         | $1.43 \times 10^{-5}$ | $4.03 \times 10^{-5}$ | $1.65 \times 10^{-4}$ | $6.11 \times 10^{-4}$ | $1.9 \times 10^{-3}$  |

**Table S2.** Proton Conductivities ( $S\cdot\text{cm}^{-1}$ ) of **2** at Different RHs and Temperatures.

| temp ( $^{\circ}\text{C}$ ) | RH (%)                |                       |                       |                       |
|-----------------------------|-----------------------|-----------------------|-----------------------|-----------------------|
|                             | 75                    | 85                    | 93                    | 98                    |
| 30                          | $8.40 \times 10^{-9}$ | $3.16 \times 10^{-8}$ | $5.53 \times 10^{-8}$ | $9.15 \times 10^{-6}$ |
| 40                          | $1.25 \times 10^{-8}$ | $7.92 \times 10^{-8}$ | $9.49 \times 10^{-8}$ | $1.03 \times 10^{-5}$ |
| 50                          | $3.90 \times 10^{-8}$ | $1.48 \times 10^{-7}$ | $4.36 \times 10^{-7}$ | $1.21 \times 10^{-5}$ |
| 60                          | $1.45 \times 10^{-7}$ | $1.85 \times 10^{-7}$ | $6.05 \times 10^{-6}$ | $1.61 \times 10^{-5}$ |
| 70                          | $1.28 \times 10^{-6}$ | $2.12 \times 10^{-6}$ | $5.46 \times 10^{-5}$ | $2.51 \times 10^{-5}$ |
| 80                          | $4.10 \times 10^{-6}$ | $1.11 \times 10^{-5}$ | $9.00 \times 10^{-5}$ | $9.74 \times 10^{-5}$ |
| 90                          | $1.19 \times 10^{-5}$ | $5.40 \times 10^{-5}$ | $1.23 \times 10^{-4}$ | $1.77 \times 10^{-4}$ |
| 100                         | $3.54 \times 10^{-5}$ | $1.06 \times 10^{-4}$ | $1.66 \times 10^{-4}$ | $1.07 \times 10^{-3}$ |

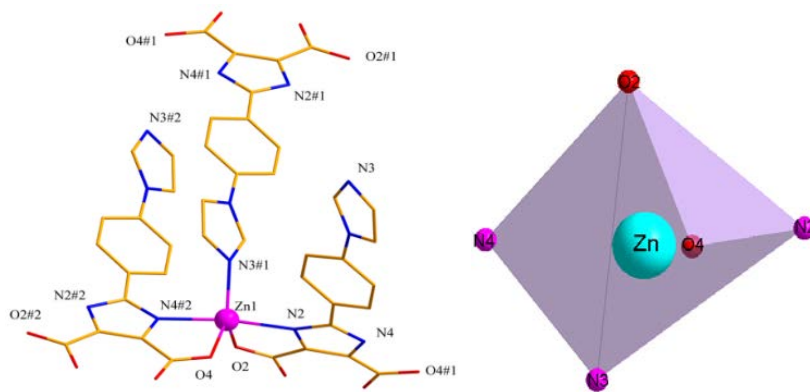**Fig. S1** (a) Coordination environment of  $\text{Zn}^{2+}$  atom in **1** (H atoms omitted for clarity).

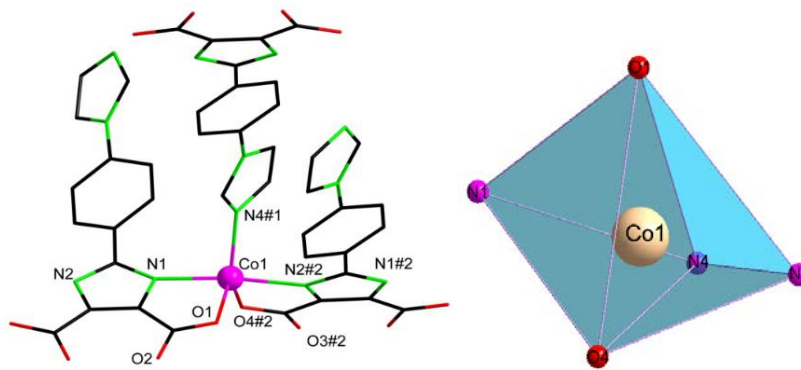

Fig. S2 Coordination environment of  $\text{Co}^{2+}$  atom in **2** (H atoms omitted for clarity).

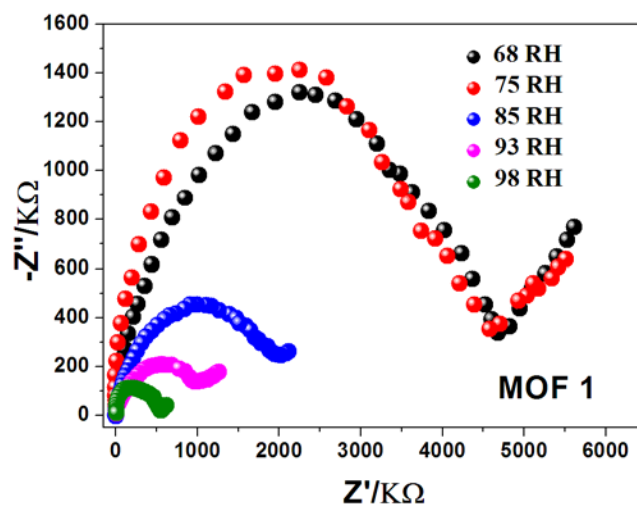

Fig. S3 Impedance spectra of **2** at 68–98% RH and 100 °C.

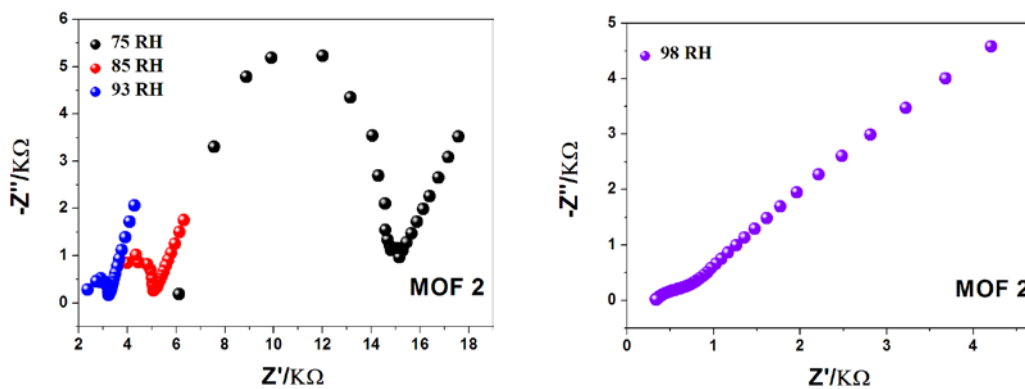

Fig.S4 Impedance spectra of **2** at 75–98% RHs and 100 °C.

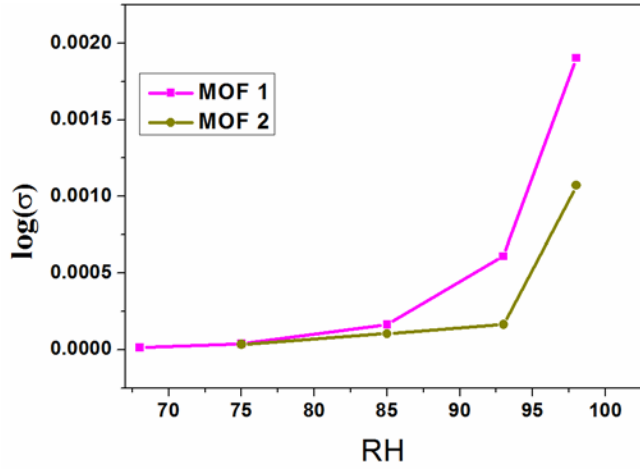

Fig.S5 Humidity dependence of the proton conductivities for 1 and 2 at 100 °C.

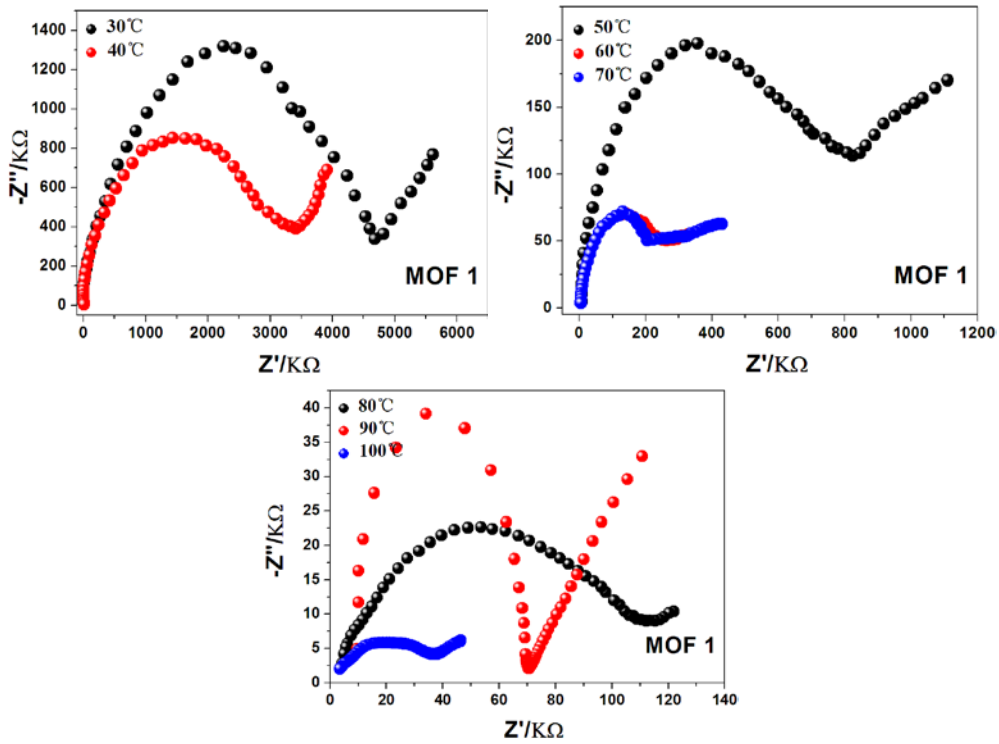

Fig. S6 Impedance spectra of 1 at 30-100 °C and 68% RH.

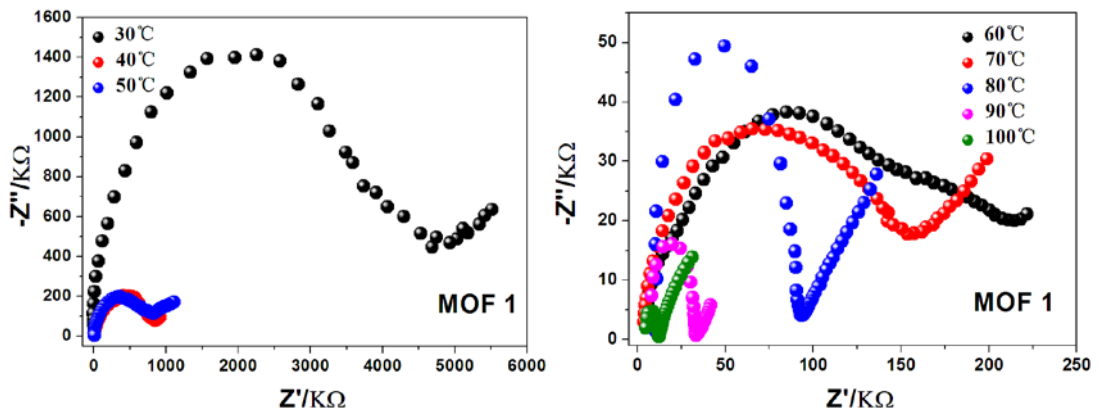

Fig. S7 Impedance spectra of 1 at 30-100 °C and 75% RH.

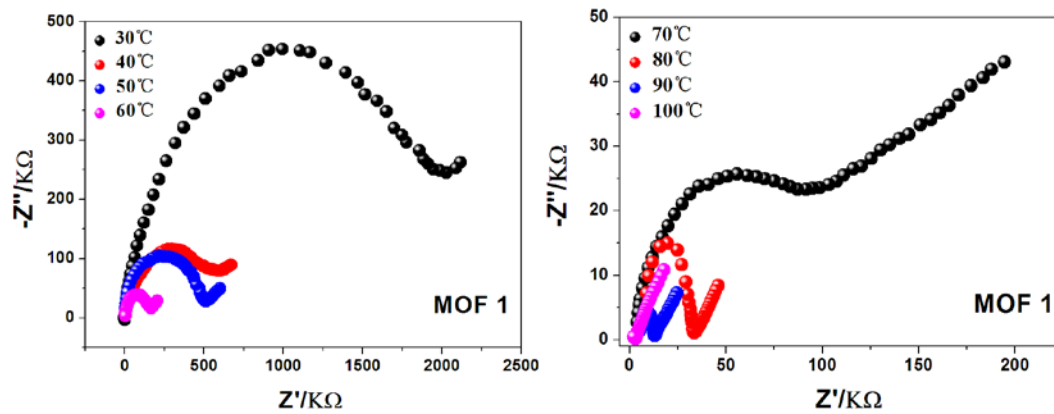

Fig. S8 Impedance spectra of **1** at 30-100 °C and 85% RHs.

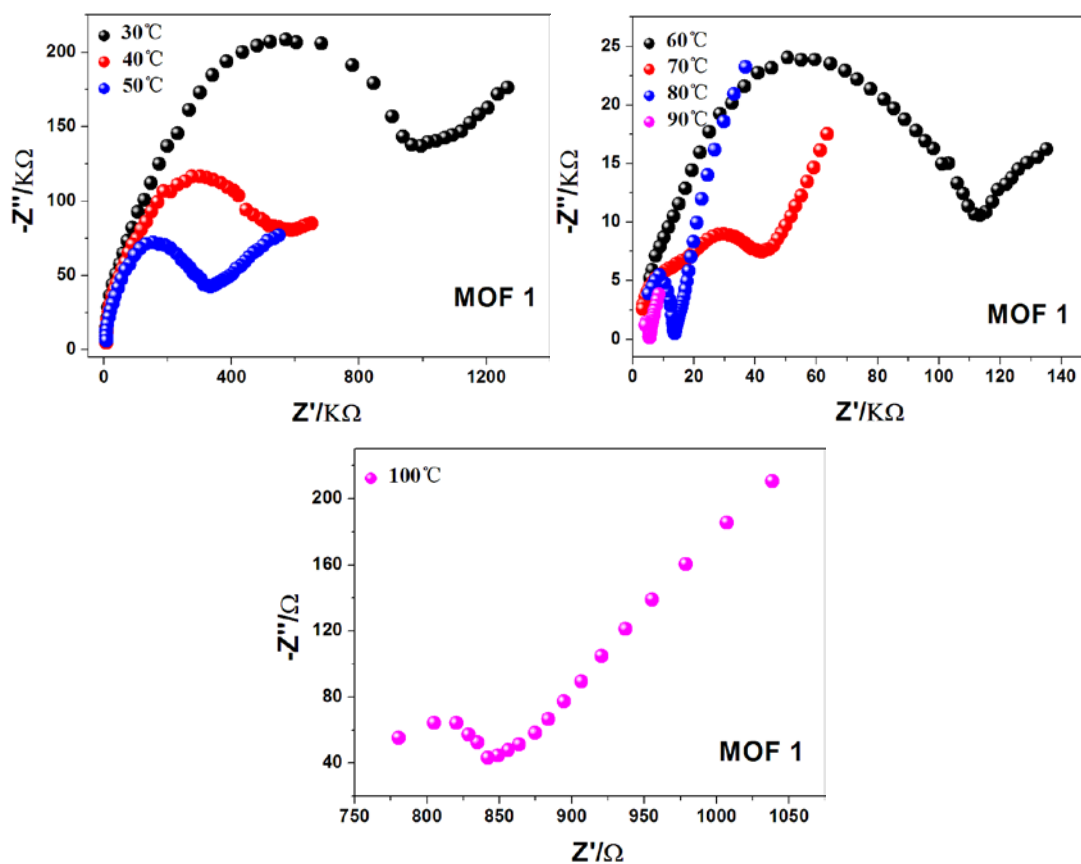

Fig. S9 Impedance spectra of **1** at 30-100 °C under 93% RH.

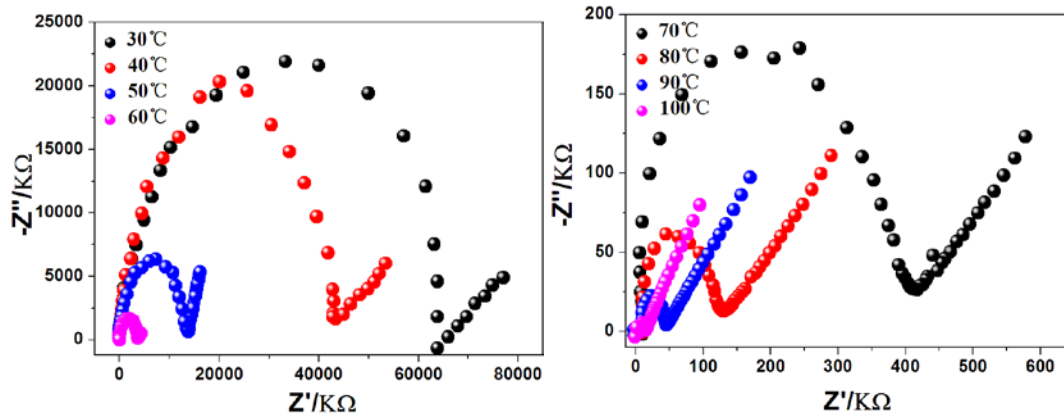

Fig. S10 Impedance spectra of **2** at 75% RH and 30-100 °C.

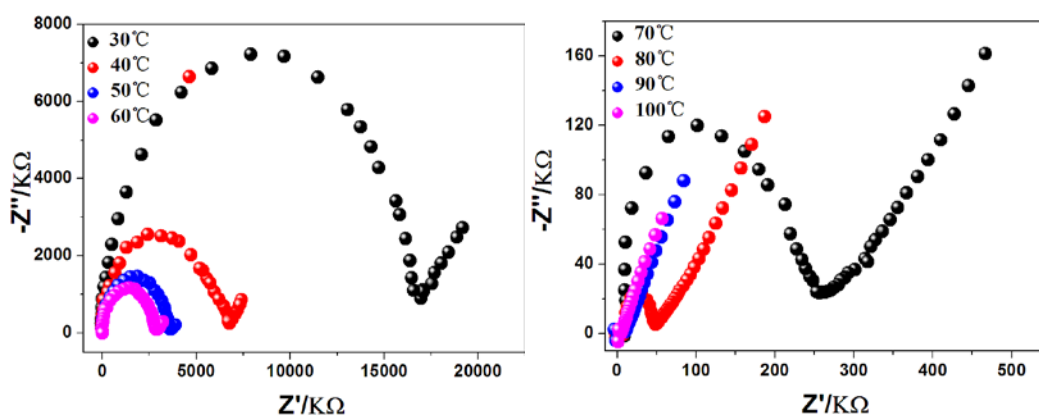

Fig. S11 Impedance spectra of **2** at 85% RH and 30-100 °C.

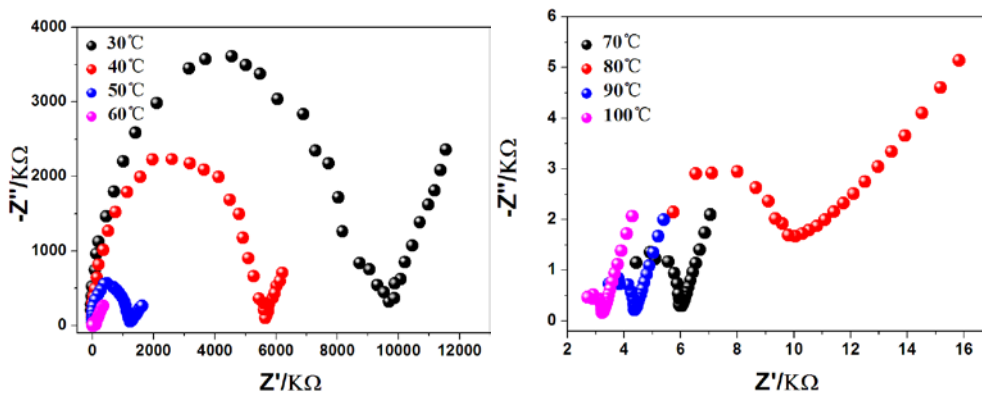

Fig. S12 Impedance spectra of **2** at 93% RH and 30-100 °C.

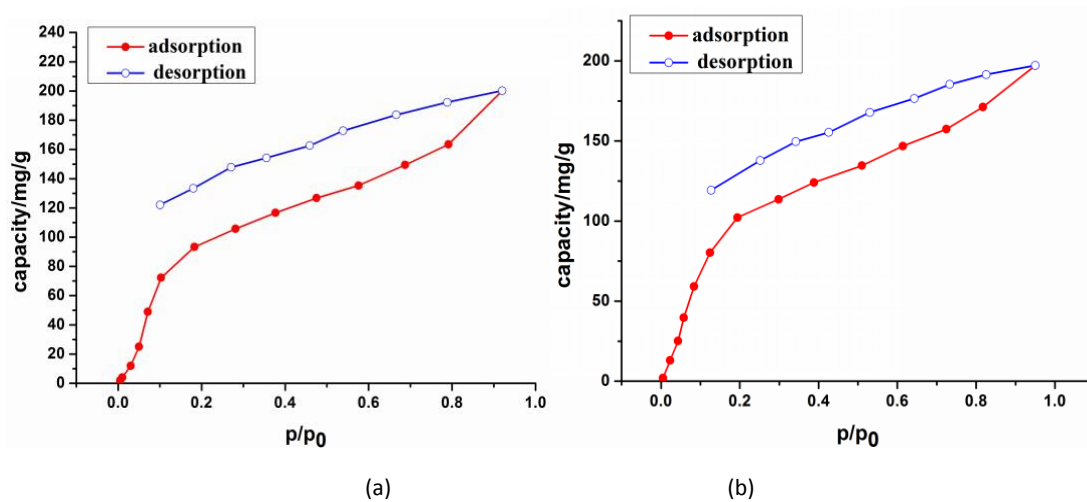

Fig. S13 The water adsorption curves of MOFs 1 (a) and 2 (b).

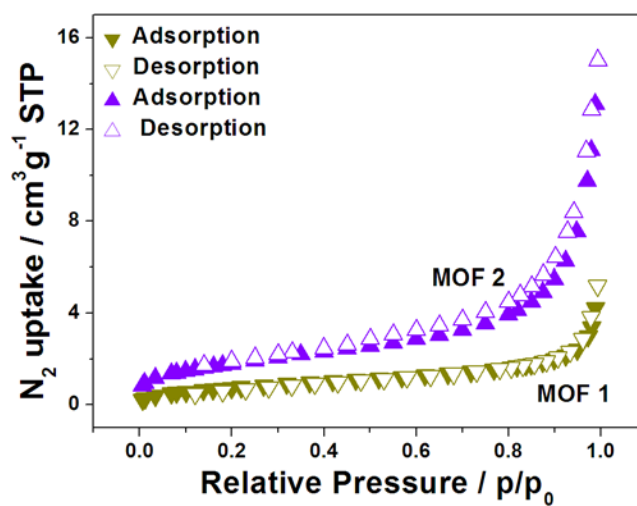

Fig. S14 N<sub>2</sub> adsorption and desorption processes of 1 and 2.

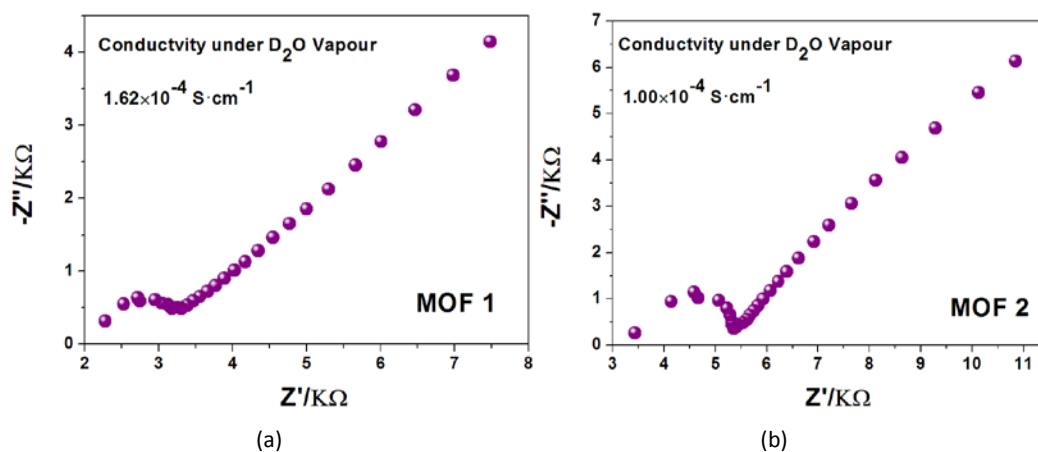

Fig. S15 Impedance spectrum of MOFs 1 (a) and 2 (b) in presence of D<sub>2</sub>O at 98% RH and 100 °C.
